# Supplementary material
Source: MDPI journal article supplement (https://www.mdpi.com/2076-3417/13/24/13336)
Supplement: s1 [file s1]

## Supplementary Materials

### SM-Figures:

#### Captions

Figure S1: Total energy vs dihedral angle plots for different tops of 2-aminopropenoic acid group.

Figure S2: The optimized structures of the six lower energy conformers of L-dopa.

Figure S3: Computed and observed UV-vis spectra of L-dopa.

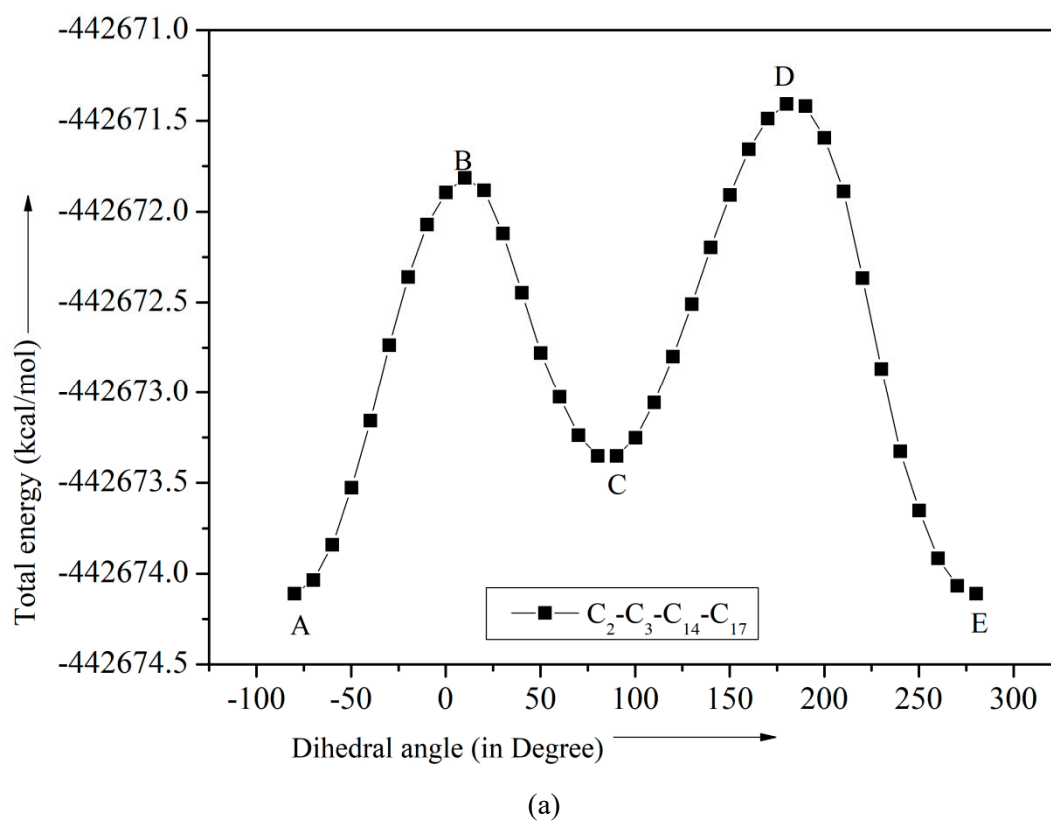

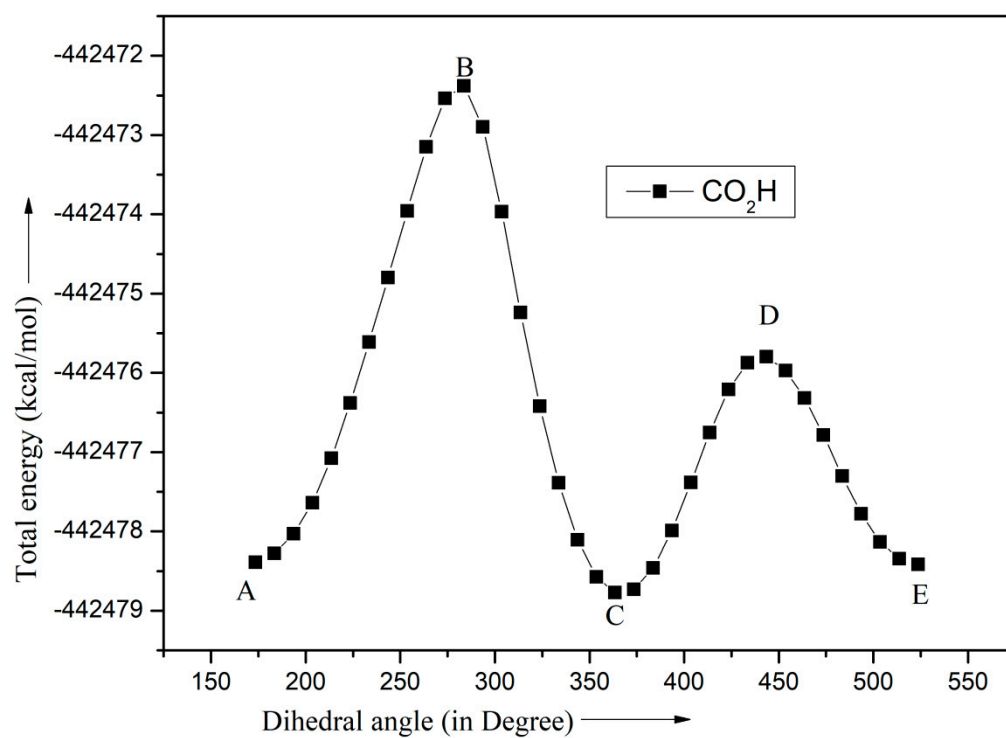

(b)

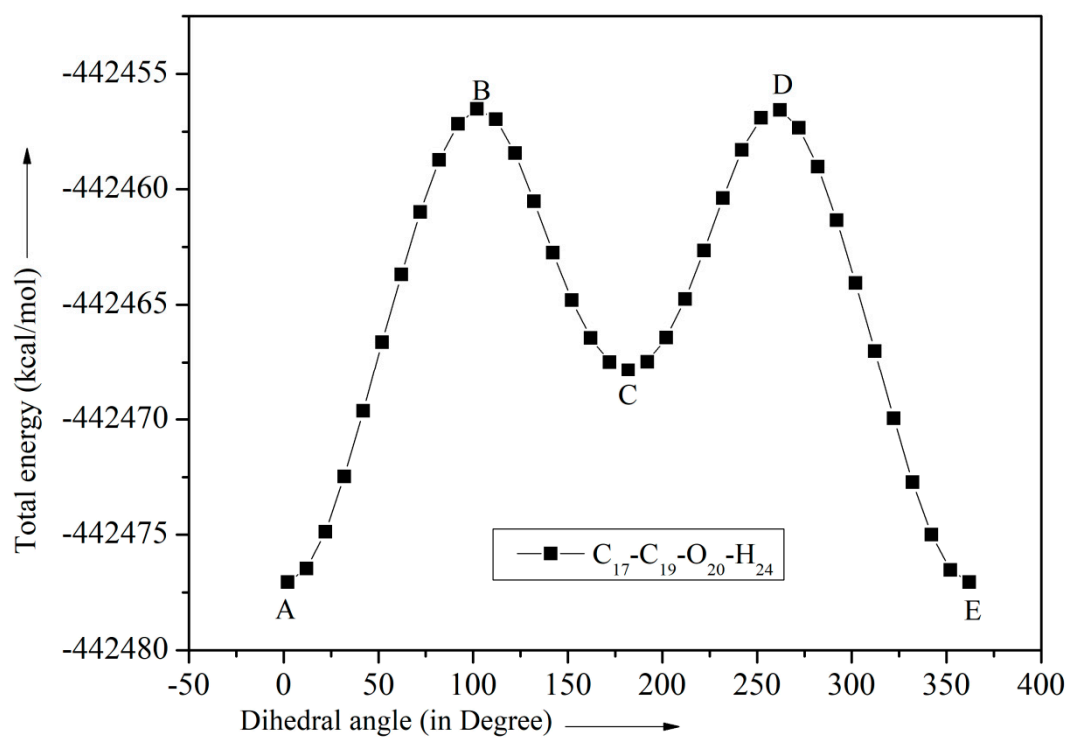

(c)

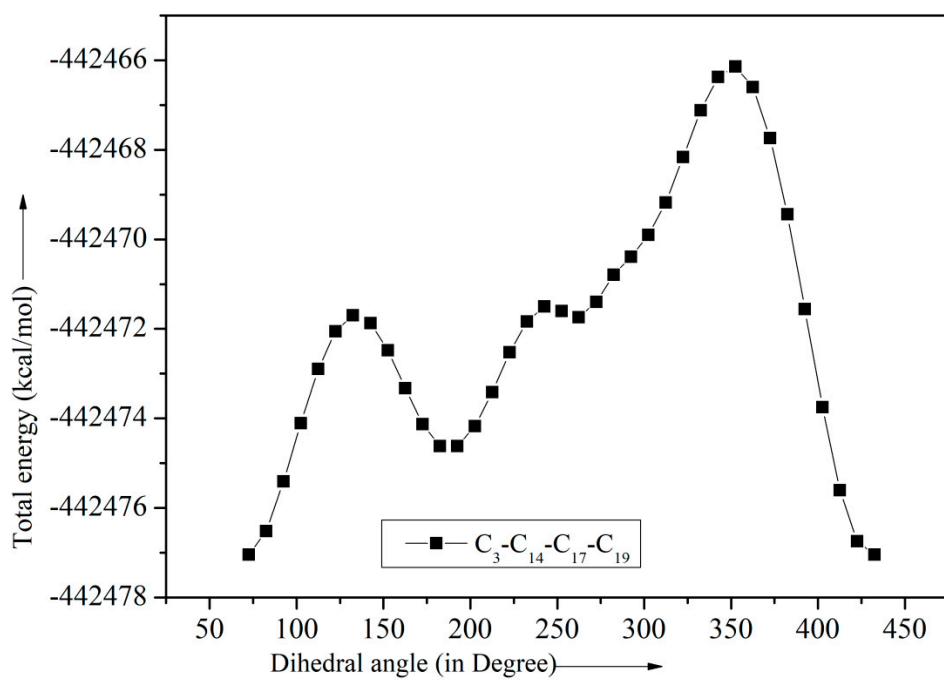

(d)

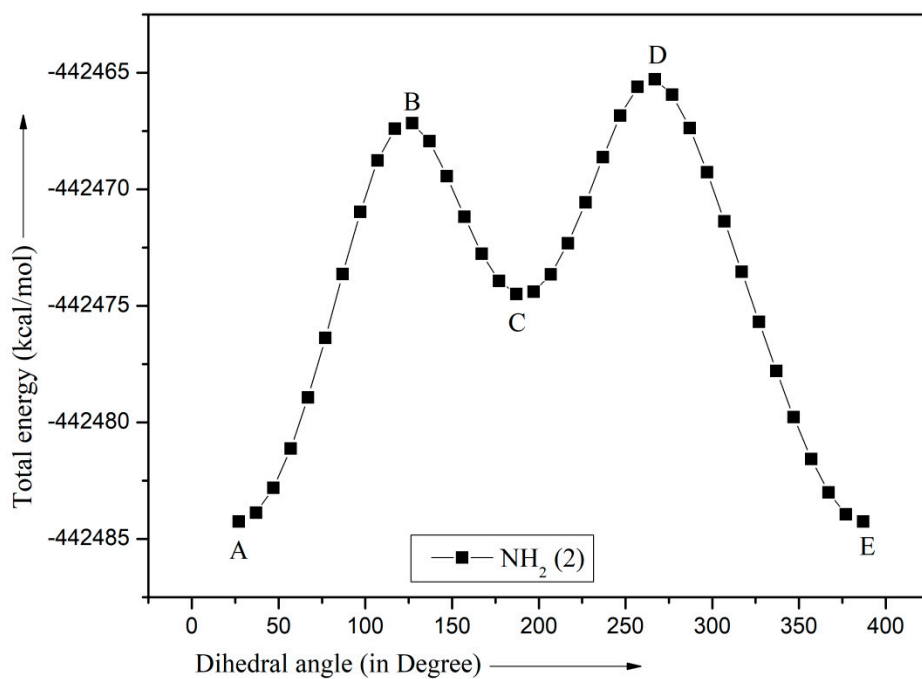

(e)

**Figure S1.** Total energy *vs* dihedral angle plots for different tops of 2-aminopropenoic acid group.

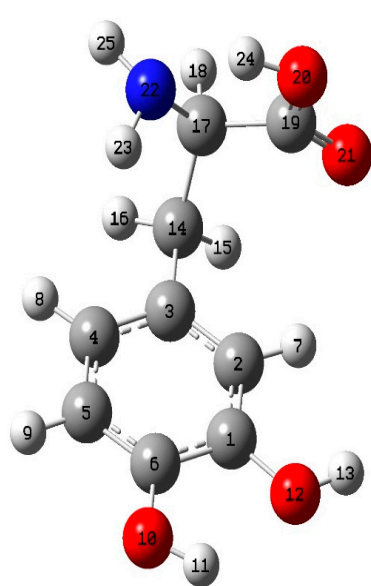

C-I

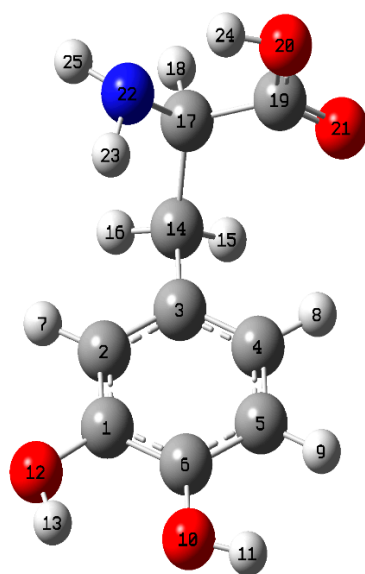

C-II

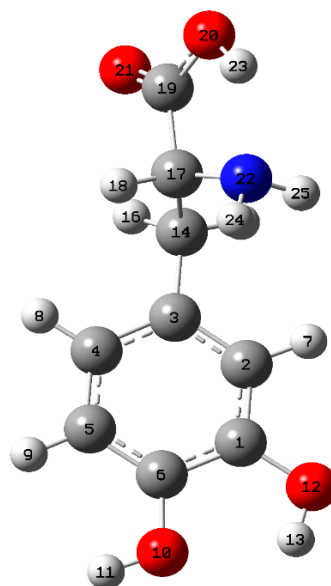

C-III

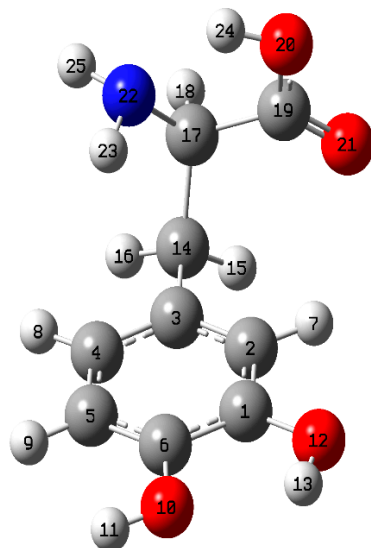

C-IV

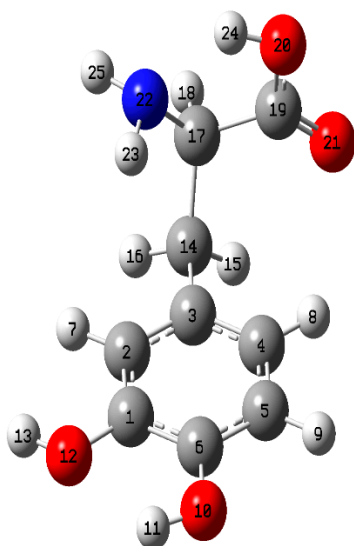

C-V

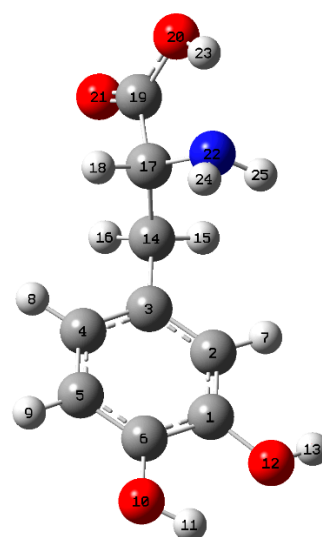

C-VI

**Figure S2.** The optimized structures of the six lower energy conformers of L-dopa.

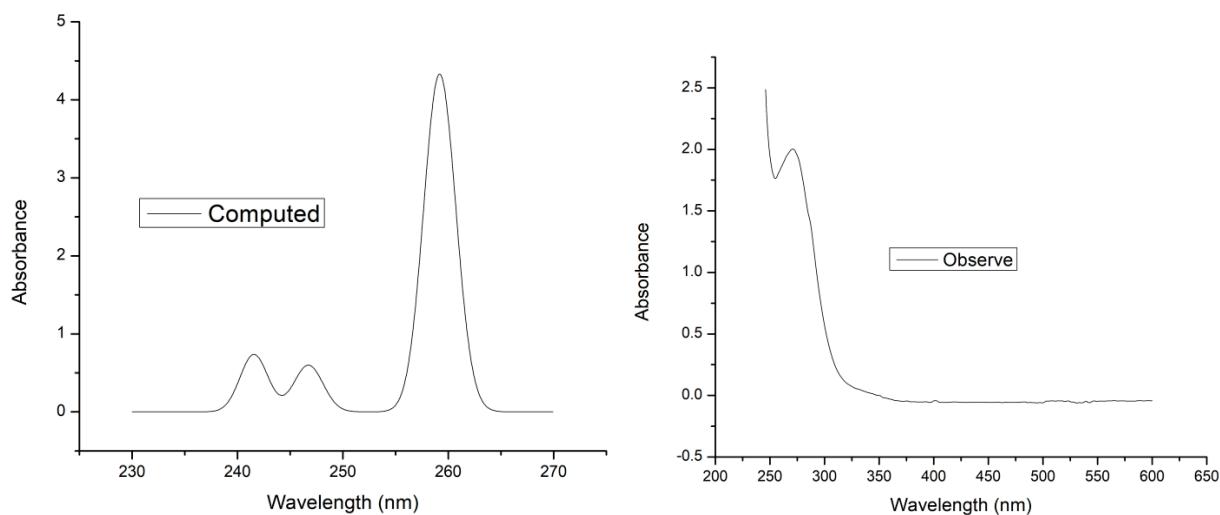

Figure S3. Computed and observed UV-vis spectra of L-dopa.

#### SM-Tables:

Table-S1. Some molecular properties of L-dopa.

| Molecular properties       |                | C-I        | D1          |
|----------------------------|----------------|------------|-------------|
| Rotational constants (GHz) | A              | 1.209      | 0.227       |
|                            | B              | 0.414      | 0.104       |
|                            | C              | 0.359      | 0.076       |
| Moment of Inertia (a. u.)  | I <sub>A</sub> | 1492       | -           |
|                            | I <sub>B</sub> | 4357       | -           |
|                            | I <sub>C</sub> | 5029       | -           |
| ZPV Energy (Kcal/mol)      |                | 123.913    | 250.424     |
| E <sub>th</sub> (Kcal/mol) |                | 132.211    | 267.463     |
| C <sub>v</sub> (Cal/mol-K) |                | 50.626     | 103.755     |
| S (Cal/mol-K)              |                | 114.808    | 186.281     |
| Dipole moment (Debye)      |                | 4.567      | 0.808       |
| Total energy (Hartree)     |                | -705.47889 | -1410.95135 |

Table-S2(a). Geometrical parameter (bond angles) of the lowest energy conformer C-I and dimer D1 of L-dopa.

| #Bond angles                                  | C-I<br>(1) | M1<br>(2) | M2<br>(3) | Ref.10<br>(4) | Ref.11<br>(5) | (2)-(1) | (3)-(1) | (4)-(1) | (5)-(1) |
|-----------------------------------------------|------------|-----------|-----------|---------------|---------------|---------|---------|---------|---------|
| $\alpha(\text{C}_2\text{-C}_1\text{-C}_6)$    | 120.5      | 120.0     | 120.0     | 120.6         | 120.8         | -0.5    | -0.5    | 0.1     | 0.3     |
| $\alpha(\text{C}_2\text{-C}_1\text{-O}_{12})$ | 124.4      | 125.1     | 125.1     | 124.5         | 124.7         | 0.7     | 0.7     | 0.1     | 0.3     |
| $\alpha(\text{C}_6\text{-C}_1\text{-O}_{12})$ | 115.1      | 114.9     | 114.9     | 114.9         | 114.5         | -0.2    | -0.2    | -0.2    | -0.6    |
| $\alpha(\text{C}_1\text{-C}_2\text{-C}_3)$    | 120.7      | 120.6     | 120.6     | -             | 120.2         | -0.1    | -0.1    | -       | -0.5    |
| $\alpha(\text{C}_1\text{-C}_2\text{-H}_7)$    | 119.2      | 119.0     | 119.0     | 119.3         | 119.4         | -0.2    | -0.2    | 0.1     | 0.2     |
| $\alpha(\text{C}_3\text{-C}_2\text{-H}_7)$    | 120.1      | 120.4     | 120.4     | -             | 120.0         | 0.3     | 0.3     | -       | -0.1    |
| $\alpha(\text{C}_2\text{-C}_3\text{-C}_4)$    | 118.3      | 118.7     | 118.7     | 118.1         | 118.3         | 0.4     | 0.4     | -0.2    | 0       |
| $\alpha(\text{C}_2\text{-C}_3\text{-C}_{14})$ | 120.8      | 120.7     | 120.7     | 121.8         | 120.3         | -0.1    | -0.1    | 1       | -0.5    |
| $\alpha(\text{C}_4\text{-C}_3\text{-C}_{14})$ | 120.9      | 120.6     | 120.6     | 120.1         | 121.4         | -0.3    | -0.3    | -0.8    | 0.5     |
| $\alpha(\text{C}_3\text{-C}_4\text{-C}_5)$    | 121.1      | 121.0     | 121.0     | 121.3         | 121.4         | -0.1    | -0.1    | 0.2     | 0.3     |
| $\alpha(\text{C}_3\text{-C}_4\text{-H}_8)$    | 119.8      | 119.8     | 119.8     | 120.6         | 119.8         | 0       | 0       | 0.8     | 0       |
| $\alpha(\text{C}_5\text{-C}_4\text{-H}_8)$    | 119.1      | 119.1     | 119.1     | 119.1         | 118.8         | 0       | 0       | 0       | -0.3    |
| $\alpha(\text{C}_4\text{-C}_5\text{-C}_6)$    | 120.1      | 119.9     | 119.9     | 120.2         | 120.7         | -0.2    | -0.2    | 0.1     | 0.6     |
| $\alpha(\text{C}_4\text{-C}_5\text{-H}_9)$    | 120.9      | 121.2     | 121.2     | 121.1         | 121.8         | 0.3     | 0.3     | 0.2     | 0.9     |
| $\alpha(\text{C}_6\text{-C}_5\text{-H}_9)$    | 119.0      | 118.9     | 118.9     | 118.7         | 118.3         | -0.1    | -0.1    | -0.3    | -0.7    |

|                                                     |       |       |       |       |       |      |      |      |      |
|-----------------------------------------------------|-------|-------|-------|-------|-------|------|------|------|------|
| $\alpha(\text{C}_1\text{-C}_6\text{-C}_5)$          | 119.3 | 119.8 | 119.8 | 119.1 | 119.1 | 0.5  | 0.5  | -0.2 | -0.2 |
| $\alpha(\text{C}_1\text{-C}_6\text{-O}_{10})$       | 120.6 | 119.7 | 119.7 | -     | 120.5 | -0.9 | -0.9 | -    | -0.1 |
| $\alpha(\text{C}_5\text{-C}_6\text{-O}_{10})$       | 120.1 | 120.5 | 120.5 | -     | 120.2 | 0.4  | 0.4  | -    | 0.1  |
| $\alpha(\text{C}_6\text{-O}_{10}\text{-H}_{11})$    | 108.6 | 107.4 | 107.4 | -     | 106.1 | -1.2 | -1.2 | -    | -2.5 |
| $\alpha(\text{C}_1\text{-O}_{12}\text{-H}_{13})$    | 111.0 | 112.7 | 112.7 | 108.9 | 110.6 | 1.7  | 1.7  | -2.1 | -0.4 |
| $\alpha(\text{C}_3\text{-C}_{14}\text{-H}_{15})$    | 110.4 | 111.0 | 111.0 | 109.6 | 110.0 | 0.6  | 0.6  | -0.8 | -0.4 |
| $\alpha(\text{C}_3\text{-C}_{14}\text{-H}_{16})$    | 109.4 | 109.4 | 109.4 | 109.6 | 110.1 | 0    | 0    | 0.2  | 0.7  |
| $\alpha(\text{C}_3\text{-C}_{14}\text{-C}_{17})$    | 114.6 | 113.9 | 113.9 | 115.9 | 112.4 | -0.7 | -0.7 | 1.3  | -2.2 |
| $\alpha(\text{H}_{15}\text{-C}_{14}\text{-H}_{16})$ | 107.2 | 107.3 | 107.3 | 106.8 | 107.3 | 0.1  | 0.1  | -0.4 | 0.1  |
| $\alpha(\text{H}_{15}\text{-C}_{14}\text{-C}_{17})$ | 107.7 | 107.6 | 107.6 | 109.3 | 108.3 | -0.1 | -0.1 | 1.6  | 0.6  |
| $\alpha(\text{H}_{16}\text{-C}_{14}\text{-C}_{17})$ | 107.2 | 107.5 | 107.5 | 105.3 | 108.0 | 0.3  | 0.3  | -1.9 | 0.8  |
| $\alpha(\text{C}_{14}\text{-C}_{17}\text{-H}_{18})$ | 107.3 | 107.7 | 107.7 | 107.9 | 107.8 | 0.4  | 0.4  | 0.6  | 0.5  |
| $\alpha(\text{C}_{14}\text{-C}_{17}\text{-C}_{19})$ | 112.3 | 112.4 | 112.4 | 112.9 | 107.4 | 0.1  | 0.1  | 0.6  | -4.9 |
| $\alpha(\text{C}_{14}\text{-C}_{17}\text{-N}_{22})$ | 115.7 | 115.4 | 115.4 | 109.4 | 116.1 | -0.3 | -0.3 | -6.3 | 0.4  |
| $\alpha(\text{H}_{18}\text{-C}_{17}\text{-C}_{19})$ | 104.2 | 103.8 | 103.8 | 106.1 | 105.7 | -0.4 | -0.4 | 1.9  | 1.5  |
| $\alpha(\text{H}_{18}\text{-C}_{17}\text{-N}_{22})$ | 108.0 | 108.4 | 108.4 | 107.4 | 108.4 | 0.4  | 0.4  | -0.6 | 0.4  |
| $\alpha(\text{C}_{19}\text{-C}_{17}\text{-N}_{22})$ | 108.6 | 108.5 | 108.5 | 112.8 | 110.3 | -0.1 | -0.1 | 4.2  | 1.7  |
| $\alpha(\text{C}_{17}\text{-C}_{19}\text{-O}_{20})$ | 113.6 | 114.6 | 114.6 | 116.9 | 112.0 | 1    | 1    | 3.3  | -1.6 |
| $\alpha(\text{C}_{17}\text{-C}_{19}\text{-O}_{21})$ | 124.1 | 122.7 | 122.7 | 123.0 | 125.4 | -1.4 | -1.4 | -1.1 | 1.3  |
| $\alpha(\text{O}_{20}\text{-C}_{19}\text{-O}_{21})$ | 122.3 | 122.6 | 122.6 | -     | 122.6 | 0.3  | 0.3  | -    | 0.3  |
| $\alpha(\text{C}_{19}\text{-O}_{20}\text{-H}_{24})$ | 103.8 | 104.4 | 104.4 | 111.3 | 106.8 | 0.6  | 0.6  | 7.5  | 3    |
| $\alpha(\text{C}_{17}\text{-N}_{22}\text{-H}_{23})$ | 111.5 | 110.9 | 110.9 | 109.7 | 109.9 | -0.6 | -0.6 | -1.8 | -1.6 |
| $\alpha(\text{C}_{17}\text{-N}_{22}\text{-H}_{25})$ | 111.9 | 112.4 | 112.4 | 109.8 | 110.4 | 0.5  | 0.5  | -2.1 | -1.5 |
| $\alpha(\text{H}_{23}\text{-N}_{22}\text{-H}_{25})$ | 107.9 | 108.4 | 108.4 | 105.2 | 108.1 | 0.5  | 0.5  | -2.7 | 0.2  |

**Table-S2(b). Geometrical parameter (dihedral angles) of the lowest energy conformer C-I and dimer D1 of L-dopa**

| #Dihedral angles                                                  | C-I<br>(1) | M1<br>(2) | M2<br>(3) | Ref.10<br>(4) | Ref.11<br>(5) | (2)-(1) | (3)-(1) | (5)-(1) |
|-------------------------------------------------------------------|------------|-----------|-----------|---------------|---------------|---------|---------|---------|
| $\delta(\text{C}_2\text{-C}_3\text{-C}_{14}\text{-C}_{17})$       | -83.1      | -82.7     | -82.7     | -             | -113.1        | 0.4     | 0.4     | -30     |
| $\delta(\text{C}_2\text{-C}_3\text{-C}_{14}\text{-H}_{16})$       | 156.5      | 157.1     | 157.1     | -             | 127.9         | 0.6     | 0.6     | -28.6   |
| $\delta(\text{C}_4\text{-C}_3\text{-C}_{14}\text{-H}_{15})$       | -141.8     | -142.6    | -142.6    | -             | -167.4        | -0.8    | -0.8    | -25.6   |
| $\delta(\text{C}_4\text{-C}_3\text{-C}_{14}\text{-H}_{16})$       | -24.0      | -24.4     | -24.4     | -             | -50.5         | -0.4    | -0.4    | -26.5   |
| $\delta(\text{C}_4\text{-C}_3\text{-C}_{14}\text{-C}_{17})$       | 96.4       | 95.8      | 95.8      | -             | 68.5          | -0.6    | -0.6    | -27.9   |
| $\delta(\text{C}_3\text{-C}_{14}\text{-C}_{17}\text{-H}_{18})$    | -173.5     | -169.6    | -169.6    | -             | -43.4         | 3.9     | 3.9     | 130.1   |
| $\delta(\text{C}_3\text{-C}_{14}\text{-C}_{17}\text{-N}_{22})$    | -52.9      | -48.4     | -48.4     | -             | -159.9        | 4.5     | 4.5     | -107    |
| $\delta(\text{C}_3\text{-C}_{14}\text{-C}_{17}\text{-C}_{19})$    | 72.5       | 76.6      | 76.6      | -             | 73.5          | 4.1     | 4.1     | 1       |
| $\delta(\text{H}_{15}\text{-C}_{14}\text{-C}_{17}\text{-H}_{18})$ | 63.2       | 66.9      | 66.9      | -             | -167.7        | 3.7     | 3.7     | -230.9  |
| $\delta(\text{H}_{15}\text{-C}_{14}\text{-C}_{17}\text{-C}_{19})$ | -50.8      | -46.8     | -46.8     | -             | -50.8         | 4       | 4       | 0       |
| $\delta(\text{H}_{16}\text{-C}_{14}\text{-C}_{17}\text{-H}_{18})$ | -51.9      | -48.3     | -48.3     | -             | 77.9          | 3.6     | 3.6     | 129.8   |
| $\delta(\text{H}_{16}\text{-C}_{14}\text{-C}_{17}\text{-N}_{22})$ | 68.7       | 72.9      | 72.9      | -             | -38.6         | 4.2     | 4.2     | -107.3  |
| $\delta(\text{H}_{16}\text{-C}_{14}\text{-C}_{17}\text{-C}_{19})$ | -165.9     | -162.0    | -162.0    | -             | -165.2        | 3.9     | 3.9     | 0.7     |
| $\delta(\text{C}_{14}\text{-C}_{17}\text{-N}_{22}\text{-H}_{23})$ | -95.7      | -97.7     | -97.7     | -             | -177.1        | -2      | -2      | -81.4   |
| $\delta(\text{C}_{14}\text{-C}_{17}\text{-N}_{22}\text{-H}_{25})$ | 25.4       | 23.8      | 23.8      | -             | -62.0         | -1.6    | -1.6    | -87.4   |
| $\delta(\text{H}_{18}\text{-C}_{17}\text{-N}_{22}\text{-H}_{25})$ | 24.5       | 23.2      | 23.2      | -             | 66.1          | -1.3    | -1.3    | 41.6    |
| $\delta(\text{H}_{18}\text{-C}_{17}\text{-N}_{22}\text{-H}_{23})$ | 145.6      | 144.7     | 144.7     | -             | -178.8        | -0.9    | -0.9    | -324.4  |
| $\delta(\text{C}_{19}\text{-C}_{17}\text{-N}_{22}\text{-H}_{23})$ | -101.9     | -103.2    | -103.2    | -             | -50.5         | -1.3    | -1.3    | 51.4    |
| $\delta(\text{C}_{19}\text{-C}_{17}\text{-N}_{22}\text{-H}_{25})$ | 137.0      | 135.3     | 135.3     | -             | 64.6          | -1.7    | -1.7    | -72.4   |
| $\delta(\text{C}_{14}\text{-C}_{17}\text{-C}_{19}\text{-O}_{21})$ | -137.7     | -136.7    | -136.7    | -             | -56.3         | 1       | 1       | 81.4    |
| $\delta(\text{C}_{14}\text{-C}_{17}\text{-C}_{19}\text{-O}_{20})$ | 44.4       | 46.0      | 46.0      | -             | 125.8         | 1.6     | 1.6     | 81.4    |
| $\delta(\text{H}_{18}\text{-C}_{17}\text{-C}_{19}\text{-O}_{21})$ | 106.5      | 107.2     | 107.2     | -             | 62.6          | 0.7     | 0.7     | -43.9   |
| $\delta(\text{H}_{18}\text{-C}_{17}\text{-C}_{19}\text{-O}_{20})$ | -71.5      | -70.1     | -70.1     | -             | -116.3        | 1.4     | 1.4     | -44.8   |

|                                                                   |        |        |        |   |        |     |     |     |
|-------------------------------------------------------------------|--------|--------|--------|---|--------|-----|-----|-----|
| $\delta(\text{N}_{22}\text{-C}_{17}\text{-C}_{19}\text{-O}_{21})$ | 173.6  | 174.7  | 174.7  | - | 179.0  | 1.1 | 1.1 | 5.4 |
| $\delta(\text{N}_{22}\text{-C}_{17}\text{-C}_{19}\text{-O}_{20})$ | -8.5   | -7.8   | -7.8   | - | 1.1    | 0.7 | 0.7 | 9.6 |
| $\delta(\text{C}_{17}\text{-C}_{19}\text{-O}_{20}\text{-H}_{24})$ | 2.1    | 2.5    | 2.5    | - | 8.6    | 0.4 | 0.4 | 6.5 |
| $\delta(\text{O}_{25}\text{-C}_{19}\text{-O}_{20}\text{-H}_{24})$ | -179.9 | -179.8 | -179.8 | - | -173.4 | 0.1 | 0.1 | 6.5 |

<sup>#</sup> bond angles( $\alpha$ ) and dihedral angles ( $\delta$ ) in ( $^{\circ}$ ). <sup>\*</sup>M<sub>1</sub> and M<sub>2</sub> are the molecules of the dimer D<sub>1</sub> (Fig.-3)

**Table-S3. Normal mode distribution of L-dopa.**

| Group/moiety <sup>#</sup> |                                                                      | modes in symbolic form <sup>*</sup>                     | Total |
|---------------------------|----------------------------------------------------------------------|---------------------------------------------------------|-------|
| 2-ami-nopro-penoic acid   | CH <sub>2</sub>                                                      | $\nu_s + \nu_{as} + \beta_s + \rho + \omega + \tau$     | 6     |
|                           | NH <sub>2</sub>                                                      | $\nu_s + \nu_{as} + \beta_s + \rho + \omega + \tau$     | 6     |
|                           | CO <sub>2</sub> (H)                                                  | $\nu_s + \nu_{as} + \beta_s + \rho + \omega + \tau$     | 6     |
|                           | C-H                                                                  | $\nu + 2\delta$                                         | 3     |
|                           | C <sub>14</sub> -C' <sub>17</sub> N' <sub>22</sub> -C' <sub>19</sub> | $3\nu + \alpha + \tau + \beta_s + \omega + \rho + \tau$ | 9     |
| Phenyl                    | Ring                                                                 | $6\nu(\text{R}) + 3\alpha(\text{R}) + 3\Phi(\text{R})$  | 12    |
|                           | C-OH                                                                 | $2\nu + 2\beta + 2\gamma$                               | 6     |
|                           | C <sub>3</sub> -C' <sub>14</sub>                                     | $\nu + \beta + \gamma$                                  | 3     |
|                           | C-H                                                                  | $3\nu + 3\beta + 3\gamma$                               | 9     |
| OH                        | O-H                                                                  | $3\nu + 3\alpha + 3\tau$                                | 9     |

<sup>\*</sup>  $\alpha(\text{R})$ - is planer ring deformation,  $\nu(\text{R})$ - is ring stretching,  $\Phi(\text{R})$ -is non planer ring deformation,  $\beta$ - planer bending,  $\gamma$ - non planer bending,  $\beta_s$  - is scissoring of group,  $\rho$ - is rocking of group,  $\omega$ - is wiggling of the group,  $\tau$ - is torsion of group,  $\tau$  is twisting of group,  $\nu_{as}$  is Anti-symmetric stretching,  $\nu_s$  is symmetric stretching,  $\delta$ - angle deformation of group  $\delta_s$ ,  $\delta_{as}$  are symmetric and anti-symmetric angle deformation of group,

<sup>#</sup>C'<sub>14</sub> is a virtual atom at the centre of the atom C<sub>14</sub> with mass equivalent to the total mass of 2-aminopropenoic acid moiety; Similarly, the atoms N'<sub>22</sub> and C'<sub>19</sub> are the virtual atoms at the centres of the atoms N<sub>22</sub> and C<sub>19</sub> with masses of the NH<sub>2</sub> and COOH groups.

**Table-S4. Computed vibrational frequencies and their assignments of L-dopa.**

| Ref.<br>[10] | Ref.<br>[11] | Present |                |                | Their differences |         |         |         | Assignments                     |
|--------------|--------------|---------|----------------|----------------|-------------------|---------|---------|---------|---------------------------------|
|              |              | C-I     | D1             |                | (3)-(1)           | (3)-(2) | (3)-(4) | (3)-(5) |                                 |
|              |              |         | M <sub>1</sub> | M <sub>2</sub> |                   |         |         |         |                                 |
| (1)          | (2)          | (3)     | (4)            | (5)            | (3)-(1)           | (3)-(2) | (3)-(4) | (3)-(5) |                                 |
| 3834         | 3848         | 3824    | 3467           | 3457           | -10               | -24     | 357     | 367     | $\nu(\text{O-H})$               |
| 3778         | 3789         | 3773    | 3762           | 3762           | -5                | -16     | 11      | 11      | $\nu(\text{O-H})$               |
| 3684         | 3758         | 3255    | 3336           | 3337           | -429              | -503    | -81     | -82     | $\nu(\text{O-H})$               |
| 3567         | 3576         | 3595    | 3593           | 3593           | 28                | 19      | 2       | 2       | $\nu_{\text{as}}(\text{NH}_2)$  |
| 3491         | 3494         | 3501    | 3484           | 3484           | 10                | 7       | 17      | 17      | $\nu_{\text{s}}(\text{NH}_2)$   |
| 3208         | 3190         | 3189    | 3190           | 3191           | -19               | -1      | -1      | -2      | $\nu(\text{C-H})$ 2             |
| 3184         | 3173         | 3170    | 3180           | 3180           | -14               | -3      | -10     | -10     | $\nu(\text{C-H})$ 13            |
| 3152         | 3142         | 3170    | 3158           | 3158           | 18                | 28      | 12      | 12      | $\nu(\text{C-H})$ 7b            |
| 3087         | 3080         | 3099    | 3094           | 3094           | 12                | 19      | 5       | 5       | $\nu_{\text{as}}(\text{CH}_2)$  |
| 3040         | 3064         | 3061    | 3051           | 3051           | 21                | -3      | 10      | 10      | $\nu(\text{C-H})$               |
| 3020         | 3029         | 3051    | 3038           | 3038           | 31                | 22      | 13      | 13      | $\nu_{\text{s}}(\text{CH}_2)$   |
| 1824         | 1830         | 1776    | 1786           | 1784           | -48               | -54     | -10     | -8      | $\nu(\text{C=O})$               |
| 1676         | 1661         | 1648    | 1654           | 1654           | -28               | -13     | -6      | -6      | $\nu(\text{R})$ 8               |
| 1658         | 1655         | 1644    | 1646           | 1647           | -14               | -11     | -2      | -3      | $\beta_{\text{s}}(\text{NH}_2)$ |
| 1644         | 1647         | 1641    | 1643           | 1643           | -3                | -6      | -2      | -2      | $\nu(\text{R})$ 8               |
| 1560         | 1558         | 1550    | 1562           | 1563           | -10               | -8      | -12     | -13     | $\nu(\text{R})$ 19              |
| 1495         | 1491         | 1479    | 1485           | 1485           | -16               | -12     | -6      | -6      | $\beta_{\text{s}}(\text{CH}_2)$ |

|      |      |      |      |      |     |     |     |     |                                     |
|------|------|------|------|------|-----|-----|-----|-----|-------------------------------------|
| 1474 | 1474 | 1469 | 1479 | 1478 | -5  | -5  | -10 | -9  | $\nu(\text{R})$ 19                  |
| 1406 | 1426 | 1413 | 1438 | 1442 | 7   | -13 | -25 | -29 | $\alpha(\text{C-O-H})$              |
| 1395 | 1411 | 1394 | 1416 | 1416 | -1  | -17 | -22 | -22 | $\nu(\text{R})$ 14                  |
| 1362 | 1359 | 1392 | 1400 | 1401 | 30  | 33  | -8  | -9  | $\delta'(\text{C}_{17}\text{-H})$   |
| 1356 | 1350 | 1367 | 1387 | 1386 | 11  | 17  | -20 | -19 | $\omega(\text{CH}_2)$               |
| 1333 | 1341 | 1352 | 1363 | 1363 | 19  | 11  | -11 | -11 | $\beta(\text{C-H})$ (3)             |
| 1313 | 1310 | 1303 | 1312 | 1311 | -10 | -7  | -9  | -8  | $\nu(\text{C-OH})$                  |
| 1289 | 1299 | 1289 | 1297 | 1297 | 0   | -10 | -8  | -8  | $\delta(\text{CNCH})$               |
| 1281 | 1282 | 1260 | 1284 | 1283 | -21 | -22 | -24 | -23 | $\nu(\text{C-OH})$                  |
| 1225 | 1260 | 1242 | 1254 | 1254 | 17  | -18 | -12 | -12 | $\rho(\text{CH}_2)$                 |
| 1213 | 1221 | 1211 | 1245 | 1243 | -2  | -10 | -34 | -32 | $\alpha(\text{C-O-H})$              |
| 1189 | 1200 | 1201 | 1222 | 1222 | 12  | 1   | -21 | -21 | $\nu(\text{C-OH})$                  |
| 1176 | 1182 | 1178 | 1216 | 1212 | 2   | -4  | -38 | -34 | $\alpha(\text{C-O-H})$              |
| 1165 | 1164 | 1171 | 1175 | 1175 | 6   | 7   | -4  | -4  | $\rho(\text{NH}_2)$                 |
| 1151 | 1133 | 1156 | 1161 | 1161 | 5   | 23  | -5  | -5  | $\beta(\text{C-H})$                 |
| 1139 | 1123 | 1123 | 1135 | 1135 | -16 | 0   | -12 | -12 | $\beta(\text{C-H})$                 |
| 1121 | 1092 | 1096 | 1091 | 1091 | -25 | 4   | 5   | 5   | $\nu(\text{C}_{17}\text{-N})$       |
| 1004 | 1015 | 1018 | 1020 | 1020 | 14  | 3   | -2  | -2  | $\nu(\text{C}_{14}\text{-C}_{17})$  |
| 977  | 969  | 972  | 976  | 976  | -5  | 3   | -4  | -4  | $\nu(\text{Cph-C})$                 |
| 965  | 930  | 951  | 946  | 947  | -14 | 21  | 5   | 4   | $\gamma(\text{C-H})$                |
| 950  | 888  | 929  | 936  | 937  | -21 | 41  | -7  | -8  | $\tau(\text{C-OH})$                 |
| 903  | 876  | 911  | 920  | 919  | 8   | 35  | -9  | -8  | $\text{t}(\text{CH}_2)$             |
| 860  | 854  | 888  | 887  | 890  | 28  | 34  | 1   | -2  | $\gamma(\text{C-H})$                |
| 839  | 837  | 864  | 872  | 872  | 25  | 27  | -8  | -8  | $\omega(\text{NH}_2)$               |
| 804  | 821  | 845  | 844  | 845  | 41  | 24  | 1   | 0   | $\alpha(\text{R})$                  |
| 794  | 806  | 822  | 822  | 822  | 28  | 16  | 0   | 0   | $\gamma(\text{C-H})$                |
| 765  | 775  | 791  | 801  | 801  | 26  | 16  | -10 | -10 | $\nu(\text{R})$ 1                   |
| 719  | 736  | 771  | 782  | 780  | 52  | 35  | -11 | -9  | $\nu(\text{C}_{17}\text{-C}_{19})$  |
| 699  | 710  | 731  | 738  | 747  | 32  | 21  | -7  | -16 | $\Phi(\text{R})$ -4                 |
| 651  | 654  | 723  | 730  | 729  | 72  | 69  | -7  | -6  | $\alpha(\text{R})$ -12              |
| 605  | 621  | 655  | 709  | 713  | 50  | 34  | -54 | -58 | $\phi(\text{R})$                    |
| 593  | 597  | 594  | 659  | 660  | 1   | -3  | -65 | -66 | $\alpha(\text{R})$                  |
| 559  | 590  | 578  | 602  | 602  | 19  | -12 | -24 | -24 | $\beta_s(\text{CO}_2\text{H})$      |
| 543  | 538  | 542  | 580  | 581  | -1  | 4   | -38 | -39 | $\delta_2(\text{CNCH})$             |
| 485  | 520  | 528  | 550  | 555  | 43  | 8   | -22 | -27 | $\rho(\text{CO}_2\text{H})$         |
| 462  | 467  | 483  | 535  | 538  | 21  | 16  | -52 | -55 | $\beta(\text{C-O})_{\text{ip}}$     |
| 452  | 458  | 459  | 489  | 493  | 7   | 1   | -30 | -34 | $\phi(\text{R})$                    |
| 433  | 433  | 426  | 477  | 477  | -7  | -7  | -51 | -51 | $\alpha(\text{R})$                  |
| 388  | 395  | 391  | 452  | 453  | 3   | -4  | -61 | -62 | $\tau(\text{C}_6\text{-O}_{10})$    |
| 326  | 361  | 377  | 428  | 431  | 51  | 16  | -51 | -54 | $\delta(\text{CNCH})$               |
| 310  | 323  | 351  | 384  | 383  | 41  | 28  | -33 | -32 | $\gamma(\text{C}_6\text{-O}_{10})$  |
| 306  | 312  | 331  | 357  | 359  | 25  | 19  | -26 | -28 | $\tau(\text{C}_{17}\text{-N}_{22})$ |
| 294  | 292  | 316  | 348  | 349  | 22  | 24  | -32 | -33 | $\tau(\text{C}_{19}\text{-O}_{20})$ |
| 270  | 267  | 302  | 334  | 334  | 32  | 35  | -32 | -32 | $\beta(\text{C-O})_{\text{op}}$     |
| 243  | 238  | 254  | 328  | 328  | 11  | 16  | -74 | -74 | $\tau(\text{C}_1\text{-O}_{12})$    |
| 215  | 218  | 231  | 242  | 245  | 16  | 13  | -11 | -14 | $\gamma(\text{C}_1\text{-O}_{12})$  |
| 186  | 174  | 194  | 211  | 218  | 8   | 20  | -17 | -24 | $\delta_{\text{as}}''(\text{CHCN})$ |



|     |     |     |     |     |    |    |    |     |                                                  |
|-----|-----|-----|-----|-----|----|----|----|-----|--------------------------------------------------|
| 159 | 163 | 164 | 173 | 174 | 5  | 1  | -9 | -10 | $\alpha(\text{C}_3\text{-C}_{17}\text{-C}_{14})$ |
| 84  | 66  | 88  | 89  | 95  | 4  | 22 | -1 | -7  | $\tau(\text{C}_{17}\text{-C}_{19})$              |
| 59  | 60  | 68  | 75  | 78  | 9  | 8  | -7 | -10 | $\tau(\text{C}_{14}\text{-C}_{17})$              |
| 39  | 44  | 53  | 54  | 62  | 14 | 9  | -1 | -9  | $\gamma(\text{C}_3\text{-C}_{14})$               |
| 30  | 33  | 36  | 39  | 51  | 6  | 3  | -3 | -15 | $\tau(\text{C}_3\text{-C}_{14})$                 |

**Table-S5. Geometrical parameter of the first six lower energy conformers of L-dopa.**

| Parameters#                | (I)   | (II)  | (III) | (IV)  | (V)   | (VI)  |
|----------------------------|-------|-------|-------|-------|-------|-------|
| r(C1-C2)                   | 1.387 | 1.390 | 1.391 | 1.389 | 1.391 | 1.390 |
| r(C1-C6)                   | 1.403 | 1.400 | 1.400 | 1.403 | 1.400 | 1.400 |
| r(C1-O12)                  | 1.376 | 1.379 | 1.363 | 1.361 | 1.364 | 1.378 |
| r(C2-C3)                   | 1.404 | 1.403 | 1.399 | 1.402 | 1.401 | 1.400 |
| r(C2-H7)                   | 1.086 | 1.088 | 1.085 | 1.084 | 1.085 | 1.087 |
| r(C3-C4)                   | 1.398 | 1.400 | 1.399 | 1.398 | 1.399 | 1.399 |
| r(C3-C14)                  | 1.514 | 1.514 | 1.512 | 1.514 | 1.514 | 1.512 |
| r(C4-C5)                   | 1.396 | 1.393 | 1.395 | 1.398 | 1.395 | 1.393 |
| r(C4-H8)                   | 1.085 | 1.083 | 1.085 | 1.085 | 1.083 | 1.085 |
| r(C5-C6)                   | 1.388 | 1.390 | 1.389 | 1.386 | 1.389 | 1.391 |
| r(C5-H9)                   | 1.083 | 1.083 | 1.086 | 1.086 | 1.086 | 1.084 |
| r(C6-O10)                  | 1.363 | 1.363 | 1.378 | 1.377 | 1.378 | 1.363 |
| r(O10-H11)                 | 0.966 | 0.966 | 0.962 | 0.962 | 0.962 | 0.966 |
| r(O12-H13)                 | 0.963 | 0.962 | 0.966 | 0.966 | 0.966 | 0.962 |
| r(C14-H15)                 | 1.092 | 1.092 | 1.096 | 1.092 | 1.092 | 1.096 |
| r(C14-H16)                 | 1.094 | 1.094 | 1.092 | 1.094 | 1.094 | 1.092 |
| r(C14-C17)                 | 1.549 | 1.549 | 1.544 | 1.549 | 1.549 | 1.543 |
| r(C17-H18)                 | 1.096 | 1.096 | 1.096 | 1.095 | 1.096 | 1.095 |
| r(C17-C19)                 | 1.547 | 1.548 | 1.546 | 1.548 | 1.548 | 1.546 |
| r(C17-N22)                 | 1.471 | 1.471 | 1.472 | 1.472 | 1.471 | 1.472 |
| r(C19=O20)                 | 1.337 | 1.337 | 1.340 | 1.338 | 1.338 | 1.341 |
| r(C19-O21)                 | 1.205 | 1.204 | 1.203 | 1.204 | 1.205 | 1.203 |
| $\alpha(\text{C2-C1-C6})$  | 121   | 121   | 120   | 120   | 120   | 121   |
| $\alpha(\text{C2-C1-O12})$ | 124   | 124   | 120   | 120   | 120   | 124   |
| $\alpha(\text{C6-C1-O12})$ | 115   | 115   | 121   | 121   | 121   | 115   |
| $\alpha(\text{C1-C2-C3})$  | 121   | 121   | 121   | 121   | 121   | 121   |
| $\alpha(\text{C1-C2-H7})$  | 120   | 119   | 118   | 118   | 118   | 119   |
| $\alpha(\text{C3-C2-H7})$  | 120   | 120   | 121   | 121   | 121   | 120   |
| $\alpha(\text{C2-C3-C4})$  | 118   | 118   | 119   | 119   | 119   | 118   |
| $\alpha(\text{C2-C3-C14})$ | 121   | 120   | 121   | 121   | 120   | 121   |
| $\alpha(\text{C4-C3-C14})$ | 121   | 122   | 121   | 121   | 121   | 121   |
| $\alpha(\text{C3-C4-C5})$  | 121   | 121   | 121   | 121   | 121   | 121   |
| $\alpha(\text{C3-C4-H8})$  | 120   | 120   | 120   | 120   | 120   | 120   |
| $\alpha(\text{C5-C4-H8})$  | 119   | 119   | 119   | 119   | 120   | 119   |
| $\alpha(\text{C4-C5-C6})$  | 120   | 121   | 120   | 120   | 120   | 120   |
| $\alpha(\text{C4-C5-H9})$  | 121   | 121   | 120   | 120   | 120   | 121   |
| $\alpha(\text{C6-C5-H9})$  | 119   | 119   | 120   | 120   | 120   | 119   |

|                              |     |     |     |     |     |     |
|------------------------------|-----|-----|-----|-----|-----|-----|
| $\alpha(\text{C1-C6-C5})$    | 119 | 119 | 120 | 120 | 120 | 119 |
| $\alpha(\text{C1-C6-O10})$   | 121 | 121 | 115 | 115 | 115 | 121 |
| $\alpha(\text{C5-C6-O10})$   | 120 | 120 | 125 | 125 | 125 | 120 |
| $\alpha(\text{C6-O10-H11})$  | 108 | 109 | 111 | 111 | 111 | 109 |
| $\alpha(\text{C1-O12-H13})$  | 111 | 111 | 109 | 109 | 108 | 111 |
| $\alpha(\text{C3-C14-H15})$  | 111 | 110 | 110 | 110 | 110 | 110 |
| $\alpha(\text{C3-C14-H16})$  | 109 | 110 | 111 | 109 | 110 | 111 |
| $\alpha(\text{C3-C14-C17})$  | 114 | 114 | 113 | 114 | 114 | 113 |
| $\alpha(\text{H15-C14-H16})$ | 107 | 107 | 107 | 107 | 107 | 106 |
| $\alpha(\text{H15-C14-C17})$ | 107 | 107 | 109 | 107 | 107 | 109 |
| $\alpha(\text{H16-C14-C17})$ | 108 | 108 | 108 | 108 | 108 | 108 |
| $\alpha(\text{C14-C17-H18})$ | 108 | 108 | 108 | 108 | 108 | 108 |
| $\alpha(\text{C14-C17-C19})$ | 112 | 112 | 111 | 112 | 112 | 111 |
| $\alpha(\text{C14-C17-N22})$ | 116 | 116 | 116 | 116 | 116 | 116 |
| $\alpha(\text{H18-C17-C19})$ | 104 | 104 | 105 | 104 | 104 | 105 |
| $\alpha(\text{H18-C17-N22})$ | 108 | 108 | 107 | 108 | 108 | 107 |
| $\alpha(\text{C19-C17-N22})$ | 109 | 110 | 110 | 110 | 109 | 110 |
| $\alpha(\text{C17-C19-O20})$ | 114 | 114 | 114 | 114 | 114 | 114 |
| $\alpha(\text{C17-C19-O21})$ | 123 | 123 | 123 | 123 | 123 | 123 |
| $\alpha(\text{O20-C19-O21})$ | 123 | 123 | 123 | 123 | 123 | 123 |

<sup>#</sup> Bond lengths in Å and bond angles in °.
